# Supplementary material for: Single crystal n-channel field effect transistors from solution-processed silylethynylated tetraazapentacene
Source: Royal Society of Chemistry journal article supplement (doi:10.1039/c1jm13153b), 2011-01-01
Supplement: c1jm13153b.pdf [file c1jm13153b.pdf]

Supporting information for:

## Single crystal n-channel field effect transistors from solution-processed silylethynylated tetraazapentacene

Chengliang Wang,<sup>†</sup> Zhixiong Liang,<sup>‡</sup> Yaling Liu,<sup>§</sup> Xiaomu Wang,<sup>†</sup> Ni Zhao,<sup>†</sup> Qian Miao,<sup>‡,\*</sup> Wenping Hu,<sup>||,\*</sup> and Jianbin Xu<sup>†,\*</sup>

<sup>†</sup>Department of Electronic Engineering and <sup>‡</sup>Department of Chemistry, The Chinese University of Hong Kong, Hong Kong SAR, China; <sup>§</sup>Laboratory for Nanomaterials, National Center for Nanoscience and Technology Beijing, 100190, China; <sup>||</sup>Beijing National Laboratory for Molecular Sciences, Key Laboratory of Organic Solids, Institute of Chemistry, Chinese Academy of Sciences, Beijing, 100190, China

E-mail: jbxu@ee.cuhk.edu.hk, miaoqian@cuhk.edu.hk, huwp@iccas.ac.cn

### Experimental

**Measurements:** The photo images were collected with an Olympus BH2-UMA optical microscope. AFM images were collected with a Digital Instruments Nanoscope III in tapping mode. X-Ray diffraction (XRD) patterns were collected with a Siemens D5005 X-ray diffraction system (CuK $\alpha$  radiation,  $\lambda = 1.54056 \text{ \AA}$ ). TEM images and SAED patterns were collected out on a Tecnai G<sup>2</sup> 20ST transmission electron microscopy instrument.

**Device fabrication and electrical characterization:** The SiO<sub>2</sub>/Si substrate was a low resistance n-type Si wafer with 300 nm-thick SiO<sub>2</sub> layer (capacitance of 11 nF/cm<sup>2</sup>). After rinsed with water, acetone and iso-propanol and cleaned with oxygen plasma, they were modified with n-octadecyltrimethoxysilane (OTMS) following reported procedures.<sup>[1]</sup> Single crystals of TIPS-TAP were grown directly onto the OTMS treated SiO<sub>2</sub>/Si substrates by drop-casting solutions of TIPS-TAP in toluene/ethanol (10 mg in 1 mL toluene and 1 mL ethanol) or toluene/acetonitrile (10 mg in 1 mL toluene and 0.4 mL acetonitrile). The crystallization was allowed to occur under an ambient atmosphere in the case of toluene/ethanol solution, and under an atmosphere of acetonitrile in the case of toluene/acetonitrile. FET devices were fabricated by gluing Au or Ag films onto single crystals as drain/source electrodes on a Wentworth LABS micromanipulator probe station. I-V measurements were conducted with a Keithley 4200 semiconductor analyzer and a JANIS ST-500-4TX micromanipulator probe station at room temperature under vacuum.

---

[1] Y. Ito, A. A. Virkar, S. Mannsfeld, J. H. Oh, M. Toney, J. Locklin and Z. Bao, *J. Am. Chem. Soc.*, 2009, **131**, 9396.

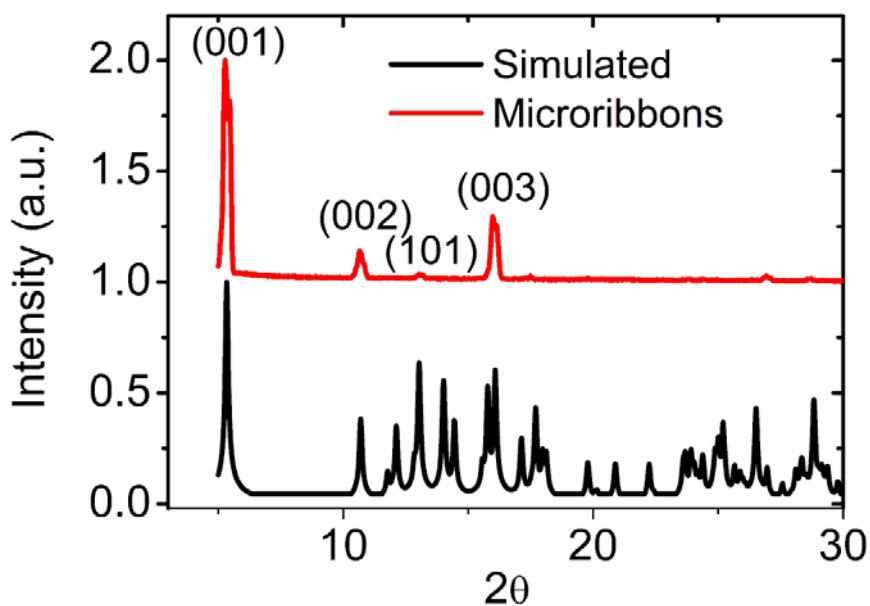

**Figure S1.** XRD patterns as collected from microribbons of solution-processed TIPS-TAP and as simulated from the single crystal structure.

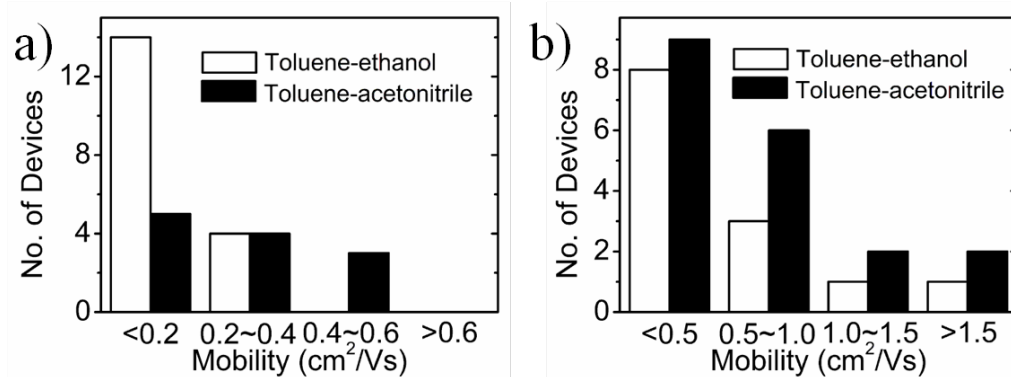

**Figure S2.** The statistics of measured field-effect mobilities of devices based on a) Au-Au contacts and b) Ag-Ag contacts.

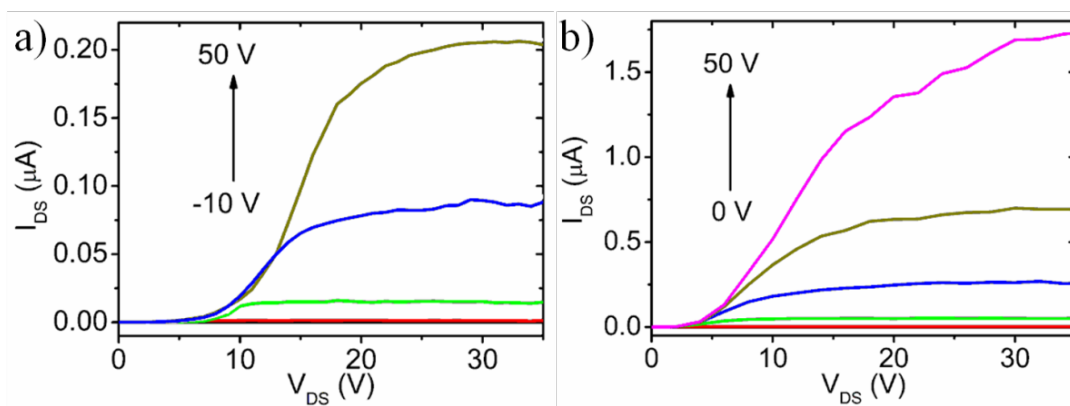

**Figure S3.** Typical output curves of devices with a) Au-Au contacts and b) Ag-Ag contacts.
